1 **Persistent homology demarcates a leaf morphospace**

2  
3 Mao Li<sup>1</sup>, Hong An<sup>2</sup>, Ruthie Angelovici<sup>2</sup>, Clement Bagaza<sup>2</sup>, Albert Batushansky<sup>2</sup>, Lynn Clark<sup>3</sup>,  
4 Viktoriya Coneva<sup>1</sup>, Michael Donoghue<sup>4</sup>, Erika Edwards<sup>5</sup>, Diego Fajardo<sup>6</sup>, Hui Fang<sup>7</sup>, Margaret  
5 Frank<sup>1</sup>, Timothy Gallaher<sup>3</sup>, Sarah Gebken<sup>2</sup>, Theresa Hill<sup>8</sup>, Shelley Jansky<sup>9,10</sup>, Baljinder Kaur<sup>7</sup>,  
6 Philip Klahs<sup>3</sup>, Laura Klein<sup>11</sup>, Vasu Kuraparthi<sup>7</sup>, Jason Londo<sup>12</sup>, Zoë Migicovsky<sup>13</sup>, Allison Miller<sup>11</sup>,  
7 Rebekah Mohn<sup>14</sup>, Sean Myles<sup>13</sup>, Wagner Otoni<sup>15</sup>, J. Chris Pires<sup>2</sup>, Edmond Riffer<sup>2</sup>, Sam  
8 Schmerler<sup>5,16</sup>, Elizabeth Spriggs<sup>4</sup>, Christopher Topp<sup>1</sup>, Allen Van Deynze<sup>8</sup>, Kuang Zhang<sup>7</sup>, Linglong  
9 Zhu<sup>7</sup>, Braden M. Zink<sup>2</sup>, Daniel H. Chitwood<sup>17,\*</sup>

10

11 <sup>1</sup>Donald Danforth Plant Science Center, St. Louis MO USA

12 <sup>2</sup>Division of Biological Sciences, University of Missouri-Columbia, Columbia, MO USA

13 <sup>3</sup>Department of Ecology, Evolution, and Organismal Biology, Iowa State University, Ames, IA  
14 USA

15 <sup>4</sup>Department of Ecology and Evolutionary Biology, Yale University, New Haven CT USA

16 <sup>5</sup>Department of Ecology and Evolutionary Biology, Brown University, Providence, RI USA

17 <sup>6</sup>National Center for Genome Resources (NCGR), Santa Fe NM USA

18 <sup>7</sup>Department of Crop and Soil Sciences, North Carolina State University, Raleigh, NC USA

19 <sup>8</sup>Department of Plant Sciences, University of California-Davis, Davis CA USA

20 <sup>9</sup>Vegetable Crops Research Unit, USDA-Agricultural Research Service, Madison WI USA

21 <sup>10</sup>Department of Horticulture, University of Wisconsin-Madison, Madison WI USA

22 <sup>11</sup>Department of Biology, Saint Louis University, St. Louis MO USA

23 <sup>12</sup>Grape Genetics Unit, USDA-Agricultural Research Service, Geneva NY USA

24 <sup>13</sup>Department of Plant, Food, and Environmental Sciences, Dalhousie University, Truro, Nova  
25 Scotia, Canada

26 <sup>14</sup>Miami University, Oxford OH USA

27 <sup>15</sup>Departamento de Biologia Vegetal, Universidade Federal de Viçosa, Viçosa, Minas Gerais,  
28 Brasil

29 <sup>16</sup>American Museum of Natural History, New York, NY USA

30 <sup>17</sup>Independent Researcher, Santa Rosa CA USA

31

32

33 Short title: Persistent homology and leaf shape

34

35 \*To whom correspondence should be addressed:

36

37 Daniel H. Chitwood

38 Independent Researcher

39 Santa Rosa, CA 95409

40 dhchitwood@gmail.com

41

42

43

44 **Abstract**

45

46 Current morphometric methods that comprehensively measure shape cannot compare the  
47 disparate leaf shapes found in seed plants and are sensitive to processing artifacts. We explore  
48 the use of persistent homology, a topological method applied across the scales of a function, to  
49 overcome these limitations. The described method isolates subsets of shape features and  
50 measures the spatial relationship of neighboring pixel densities in a shape. We apply the  
51 method to the analysis of 182,707 leaves, both published and unpublished, representing 141  
52 plant families collected from 75 sites throughout the world. By measuring leaves from  
53 throughout the seed plants using persistent homology, a defined morphospace comparing all  
54 leaves is demarcated. Clear differences in shape between major phylogenetic groups are  
55 detected and estimates of leaf shape diversity within plant families are made. This approach  
56 does not only predict plant family, but also the collection site, confirming phylogenetically  
57 invariant morphological features that characterize leaves from specific locations. The  
58 application of a persistent homology method to measure leaf shape allows for a unified  
59 morphometric framework to measure plant form, including shape and branching architectures.

60

61 **Introduction**

62

63 As generally flattened structures, leaves provide a unique opportunity to quantify morphology  
64 as a two-dimensional shape. Local features (such as serrations and lobes) and general shape  
65 attributes (like length-to-width ratio) can be measured, but numerous methods also exist to  
66 measure leaf shape more globally and comprehensively. A popular method to quantify leaf  
67 shape is to place  $(x, y)$  coordinates, known as landmarks, on homologous features that are  
68 related by descent from a common ancestor on every sample (Bookstein, 1997). The set of  
69 landmarks from each leaf can be superimposed by translation, rotation, and scaling using a  
70 Generalized Procrustes Analysis (Gower, 1975). Once superimposed, the Procrustes-adjusted  
71 coordinates of each shape can be used directly for statistical analyses. Landmark analysis excels

72 in its interpretability, because each landmark is an identifiable feature with biological meaning  
73 imparted by the shared homology between samples. Because landmarks are homologous  
74 features, their use often reveals genetic and developmental patterns in shape variation  
75 (Chitwood et al., 2016a).

76  
77 Not all leaves have obvious homologous features that can be used as landmarks. Further, when  
78 comparing leaves with disparate morphologies (e.g., simple vs. compound leaves), there may  
79 not be identifiable homologous points. Nearly all leaves have homologous landmarks at the tip  
80 and base, but if there are no other identifiable landmarks, an equal number of equidistant  
81 points on each sample between the landmarks can be placed (Langlade et al., 2005). The denser  
82 and more numerous such pseudo-landmarks are, the closer they come to approximating the  
83 contour itself.

84  
85 Another method, the use of Elliptical Fourier Descriptors (EFDs), measures shape as a  
86 continuous closed contour, and can also be used when homologous features are absent. EFD  
87 analysis begins with a lossless data compression method called chain-code, in which the  
88 direction to move from one pixel to the next is recorded as a chain of numbers (where each link  
89 in the chain  $a$  is an integer between 0 and 7 specifying the pixel direction  $\left(\frac{\pi}{4}\right) a$ ) so that from  
90 this chain of numbers the closed contour can be faithfully reproduced (Freeman, 1974). The  
91 chain code is decomposed by a Fourier analysis into a harmonic series that is used to quantify  
92 an approximate reconstruction of the shape (Kuhl and Giardina, 1982).

93  
94 Both pseudo-landmarks and EFDs measure leaf shapes for which homologous features that can  
95 be used as landmarks are lacking (Bensmihen et al., 2008; Chitwood and Otoni, 2017). Still,  
96 when comparing disparate leaf shapes, unless major sources of shape variance in the data (such  
97 as the number of lobes or leaflets) are present in every sample, individual pseudo-landmarks or  
98 harmonic coefficients will not correspond between samples in a comparable way useful for  
99 analysis. Recently, a computer vision method coupled with machine learning was used to

100 classify leaves, with diverse vascular patterns and leaf shapes, into plant families and orders  
101 (Wilf et al., 2016). This method uses a visual descriptor to train a classifier. Since cleared leaves  
102 are used, this method relies on both internal features like branch points in the vasculature as  
103 well as features on the leaf margin, instead of just leaf shape alone as in traditional  
104 morphometric approaches. Nonetheless, the method overcomes a central problem in the  
105 morphometric analysis of leaves: comparing leaves with very different morphologies.

106

107 To develop a morphometric method that 1) comprehensively measures shape features in  
108 leaves, both locally and globally, 2) can compare disparate leaves shapes, 3) is robust against  
109 noise commonly found in leaf shape data (e.g., internal holes because of overlapping leaflets or  
110 small defects introduced during imaging and thresholding), and 4) is potentially compatible  
111 with other plant phenotyping needs (e.g., measuring the branching architectures of roots and  
112 trees, the spatial distributions of plants in ecosystems, or the texture of different pollen types;  
113 Mander et al., 2013; 2017; Li et al., 2017b) we used a persistent homology approach. Persistent  
114 homology is a topological data analysis method. Topology is the field of mathematics concerned  
115 with properties of space preserved under deformations (e.g., bending) but not tearing or re-  
116 attaching. Persistent homology measures topological features across the scales of a function  
117 (Edelsbrunner and Harer, 2008; Weinberger, 2011; Li et al., 2017b). The compatibility of  
118 persistent homology with numerous functions makes it a versatile method that can be tailored  
119 for diverse uses (Li et al., 2017a).

120

121 Here, we present a morphometric technique based on topology, using a persistent homology  
122 framework, to measure the outlines of leaves and classify them by plant family and region in  
123 which they were collected. We analyze 182,707 leaves (freely available to download; Chitwood,  
124 2017a), from both published studies and shapes analyzed for the first time, from 141 plant  
125 families and 75 sites throughout the world. We first compare the diverse shapes represented in  
126 a common morphospace using persistent homology, which captures traditional shape  
127 descriptors in a non-linear fashion. Major phylogenetic groups of plants occupy distinct regions

128 of the morphospace and we estimate plant families that have the most and least diverse leaf  
129 shapes. Using persistent homology, we then use a linear discriminant analysis to classify leaves  
130 by plant family and collection site. Persistent homology predicts both family and collection site  
131 at a rate above chance, and predicts leaf family at 2.7 times and collection site at 1.5 times the  
132 rate of traditional shape descriptors. Persistent homology is a topological method that can  
133 measure and compare diverse leaf shapes from across seed plants and outperforms traditional  
134 shape descriptors in classifying plant families and geographic locations.

135

## 136 **Results**

137

### 138 *Dataset and a morphospace defined using traditional shape descriptors*

139

140 To broadly analyze seed plant leaf shape diversity collected from sites throughout the world,  
141 we used both published and unpublished data. In total, 182,707 leaves were analyzed (**Table 1**).  
142 Many of these datasets address specific genetic and developmental questions, focusing on  
143 genetic variability within a group or closely related species. Leaves were analyzed from the  
144 following publications, pre-prints, and authors focusing on specific groups of plants:  
145 *Alstroemeria* (2,392 leaves; Chitwood et al., 2012a), apple (9,619 leaves; Migicovsky et al.,  
146 2017), *Arabidopsis* (5,101 leaves; AB, RA, CB, ER, BZ), *Brassica* (1,832 leaves; HA, SG, JCP),  
147 *Capsicum* (3,277 leaves; TH, AVD), *Coleus* (34,607 leaves; VC, MF, ML), cotton (2,885 leaves;  
148 Andres et al., 2017), grapevine and wild relatives (20,121 leaves; Chitwood et al., 2014; 2016a;  
149 2016b; VC, MF, LK, JL, AM), *Hedera* (common ivy, 865 leaves; Martinez et al., 2016), *Passiflora*  
150 (3,301 leaves; Chitwood and Otoni, 2017), Poaceae (866 leaves; LC, TG, PK), wild and cultivated  
151 potato (1,840 leaves; DF, SJ), tomato and wild relatives (82,034 leaves; Chitwood et al., 2012b;  
152 2012c; 2013), and *Viburnum* (2,422 leaves; Schmerler et al., 2012; MD, EE, SS, ES). We also  
153 analyzed two datasets that sample broadly across seed plants and from sites throughout the  
154 world. The Leafsnap dataset, with 5,733 leaves, represents mostly tree species of the  
155 Northeastern United States, but other groups of plants as well (Kumar et al., 2012). The Climate

156 dataset, with 5,812 leaves total, analyzes the relationship between leaf shape and present  
157 climates as indicators of paleoclimate (Huff et al., 2003; Royer et al., 2005; Peppe et al., 2011).

158

159 We analyzed all leaves using the traditional shape descriptors circularity, aspect ratio, and  
160 solidity (**Figure 1**). These shape descriptors are simple in the sense that they each measure a  
161 very specific aspect of shape, but they are powerful in that they can be applied to any shape,  
162 which is not necessarily true of other methods that measure shape more comprehensively  
163 (such as landmarks, pseudo-landmarks, and Elliptical Fourier Descriptors). Circularity is a ratio  
164 of area to perimeter (true perimeter, excluding holes in the middle of the object) measured as  
165  $4\pi * (\frac{area}{perimeter^2})$  and is sensitive to undulations (like serrations, lobes, and leaflets) along the  
166 leaf perimeter, but is also influenced by elongated shapes (like grass leaves) when comparing  
167 leaves with such different shapes, as in this analysis. Aspect ratio is measured as  $(major\ axis)/$   
168  $(minor\ axis)$  of a fitted ellipse, and it is a robust metric of overall length-to-width ratio of a  
169 leaf. Solidity is measured as  $\frac{area}{convex\ hull}$  where the convex hull bounds the leaf shape as a  
170 polygon. Leaves with a large discrepancy between area and convex hull (such as compound  
171 leaves with leaflets, leaves with deep lobes, or leaves with a distinct petiole) can be  
172 distinguished from leaves lacking such features using solidity.

173

174 Differences between groups were visualized as scatterplots and density diagrams (**Figure 1**),  
175 using transformed values of aspect ratio ( $1/(aspect\ ratio)$ ) and solidity ( $solidity^8$ ) to create  
176 more even distributions that allow the separation between groups to be better visualized. The  
177 long leaves of grasses (Poaceae, lavender) are perhaps the most distinct group of leaf shapes.  
178 The Brassicaceae (light green) are bimodal in their distribution, reflecting entire vs. highly lobed  
179 and compound leaves, as well as differences in petiole length. *Passiflora* (dark orange),  
180 Solanaceae (purple), and *Viburnum* (brown) exhibit broad, continuous distributions, which like  
181 the Brassicaceae reflect the diversity of leaf shapes in these groups. *Alstroemeria* (light blue),  
182 apple (light orange), *Coleus* (pink), cotton (dark green), grapevine (red), and common ivy (dark  
183 blue) all have more localized distributions in the morphospace, indicating that shape variation is

184 expressed within a smaller range, relative to other groups, as measured using traditional shape  
185 descriptors.

186

187 *Persistent homology and non-linear relationships with traditional shape descriptors*

188

189 Although traditional shape descriptors can describe important shape features across diverse  
190 leaves, they do not measure shape comprehensively like landmarks, pseudo-landmarks, and  
191 Elliptical Fourier Descriptors. Comprehensive morphometric methods, however, cannot be  
192 applied across diverse shapes, only between leaves with similar shapes, as in natural variation  
193 studies. We crafted a persistent homology method to quantify the features of leaves,  
194 conceptualizing shape as a two-dimensional point cloud of an outline defined by pixels (Li et al.,  
195 2017a; Migicovsky et al., 2017). The method begins by calculating a Gaussian density estimator,  
196 assigning each pixel a value that indicates the density of neighboring pixels (**Figure 2**). In leaves,  
197 high density pixels with lots of neighbors tend to reside in the sinuses of serrations or lobes or  
198 at points of intersection, such as the attachment points of leaflets to the rachis of a compound  
199 leaf. Using a Gaussian density estimator, rather than focusing on continuity of a closed contour  
200 (as in pseudo-landmarks and Elliptical Fourier Descriptors), minimizes the impact of internal or  
201 non-continuous features, such as holes or occlusions made by the overlap of leaflets and lobes  
202 (see the bottom palmately-shaped leaf in **Figure 2**). Sixteen annuli emanating from the centroid  
203 of the shape (**Figure 2A**) serve to partition the leaf into subsets of features, increasing the  
204 ability to distinguish between shapes. An annulus kernel for each ring (**Figure 2C**) is multiplied  
205 by the density estimator (**Figure 2B**) to isolate density features that intersect with the annulus  
206 (**Figure 2D-E**). The resulting density function from each annulus is the function across which  
207 topological space is measured. As shown in **Figure 2F**, beginning with the highest density level,  
208 the number of connected features with densities above that level is recorded. Counting the  
209 number of connected components minus the number of holes (which is a topological feature,  
210 known as the Euler characteristic) continues across the function, proceeding to lower density  
211 levels. The value of the curve (y axis in **Figure 2F**) at each density level (x axis in **Figure 2F**)

212 records the topological structure across the values of the function, the crux of persistent  
213 homology. A curve is recorded for each annulus, so that using our method, the shape of a single  
214 leaf is represented by 16 curves.

215

216 To analyze the persistent homology output, we discretize each Euler characteristic curve into  
217 500 values (**Figure 2F**) and then concatenate these values over the 16 annuli, representing each  
218 leaf shape as 8,000 values. A Principal Component Analysis (PCA) performed using the 8,000  
219 values creates a leaf morphospace defined by persistent homology (**Figure 3**). To interpret this  
220 morphospace, we colored data using traditional shape descriptor values. Although clear  
221 patterns among aspect ratio (**Figure 3A**), circularity (**Figure 3B**), and solidity (**Figure 3C**) with  
222 persistent homology data are evident, the relationships are non-linear compared to the  
223 orthogonal PC axes. Aspect ratio, circularity, and solidity are similarly correlated with PC1 (rho  
224 values of -0.72, 0.70, and 0.61, respectively) demonstrating that persistent homology PCs can  
225 capture distinct attributes of shape simultaneously (**Figure 3D**). The correlations between  
226 traditional shape descriptors and persistent homology PCs rapidly diminish among high order  
227 PCs (**Figure 3D**). The non-linear relationship between traditional shape descriptors and  
228 persistent homology PCs indicates that persistent homology captures differing combinations of  
229 traditional shape descriptors in different ways among the represented leaf shapes. Such non-  
230 linear relationships are influenced by the different groups represented in the dataset (**Figure**  
231 **3E**). If the Leafsnap and Climate datasets are superimposed as black points on top of a density  
232 diagram representing different groups (**Figure 3F**), then the overall shape of the persistent  
233 homology space defined by specific groups is recapitulated. As the Leafsnap and Climate  
234 datasets together represent 141 plant families and 75 sites throughout the world, the data  
235 suggest that the overall shape and density of the persistent homology morphospace is partially  
236 saturated. This does not mean that there is no other significant leaf shape variation to be  
237 explored, only that some archetypal leaf shapes are well represented in our dataset. The  
238 boundaries of the persistent homology morphospace allow for speculation. Likely the  
239 morphospace is 1) bimodal, defined by elongated leaf shapes found in some Poaceae and



240 Gymnosperms (specifically Pinophyta in the Leafsnap and Climate datasets) compared to other  
241 leaf shapes and 2) is defined by variation spanning entire to deeply lobed (or even compound)  
242 leaf shapes, as represented by *Passiflora*, Solanaceae, and *Vibrunum* across PC1. Of course,  
243 other leaf shape variation exists (and is even visually apparent in the plots of PC2 vs. PC1) and  
244 other PCs in this dataset remain to be explored. The dataset does not come near to sampling  
245 all existing leaf shapes.

246

247 *Differences in leaf shape between phylogenetic groups and the most diverse plant families*

248

249 We were interested in detecting difference in leaf shape between phylogenetic groups and  
250 performed a Principal Component Analysis (PCA) for just the Leafsnap and Climate datasets  
251 (**Table 1**), which together represent 141 plant families, but without the over-representation  
252 from specific taxonomic groups presented earlier. Visualizing gymnosperms, magnoliids, rosids  
253 I, rosids II, asterids I, and asterids II across PCs 1-10 (representing 73% of shape variance) clear  
254 differences in persistent homology shape space can be detected (**Figure 4**). Differences in shape  
255 are most easily detected for the earliest diverging lineages. For example, gymnosperms occupy  
256 a distinct region of morphospace defined by PCs 1-6 (**Figure 4A-C**) compared to angiosperms.  
257 Subtler differences between recently diverging groups can also be seen. Asterids II, for  
258 example, are excluded from some regions of morphospace occupied by rosids I/II and asterids I  
259 for PCs 1-4 (**Figure 4A-B**).

260

261 Differences in occupied morphospace between phylogenetic groups prompted us to ask: are  
262 plant families diverse across all PCs or just some, and what are the most and least  
263 morphologically diverse families? To answer the first question, we calculated variance across  
264 PCs 1-179 (representing >95% of all shape variance) for each plant family and then ranked  
265 families from most to least variable for each PC (**Figure 5A**). Visualizing the ranked variability of  
266 families across PCs (the most variable ranked families for a PC depicted as yellow, the least  
267 variable black, **Figure 5A**), it is apparent that the most diverse tend be the most diverse across

268 PCs. Increased variability in persistent homology PCs, though, might simply be due to more  
269 leaves in some families compared to others. Indeed, the most diverse plant families are also the  
270 most represented in our dataset, as seen when families are arranged by abundance (**Figures 5A**,  
271 see bar graph of counts on the right side). Because highly variable families tend to be variable  
272 across PCs, we took the median rank of variance across PCs as a measure of overall family leaf  
273 shape diversity. The relationship between  $-\text{median rank variance}$  and  $\log_{10}(\text{count})$  is linear  
274 (**Figure S1**). Using linear regression, we took the residuals from the model as an estimate of  
275 plant family leaf shape diversity, corrected for differences in sample size (**Figure 5B**). A wilcoxon  
276 signed rank test on residuals indicates that asterids I are marginally significant ( $p = 0.08$ ) for  
277 lacking diversity (two sided,  $\mu = 0$ ) but other groups (gymnosperms,  $p = 0.25$ ; magnoliids,  $p =$   
278  $0.20$ ; rosids I,  $p = 0.97$ ; rosids II,  $p = 0.63$ ; asterids II,  $p = 0.63$ ) show no detectable biases in  
279 diversity. The overall results indicate that, for the current dataset, leaf shape diversity within  
280 major phylogenetic plant groups is equivalent, but specific families have higher estimated leaf  
281 shape diversity than others.

282

283 *Persistent homology predicts plant family and region and outperforms traditional shape*  
284 *descriptors*

285

286 The separation of different groups in the traditional shape descriptor (**Figure 1**) and persistent  
287 homology (**Figures 3-4**) morphospaces suggests the ability to predict the phylogenetic identity  
288 of a leaf based on its shape. Previous computer vision approaches coupled with machine  
289 learning have successfully predicted plant family and order using vein patterning and margin  
290 features (Wilf et al., 2016). Can the same be done using a persistent homology analysis of the  
291 outline alone? Using the Leafsnap and Climate datasets (**Table 1**) that together represent 141  
292 plant families, we used a Linear Discriminant Analysis (LDA) on PCs 1-179, representing >95% of  
293 the persistent homology morphospace variation, to create a classifier scheme. Leaves were  
294 then reassigned to the linear discriminant space using a cross-validated “leave one out”  
295 approach (Venables and Ripley, 2002) and the results visualized as a confusion matrix (**Figure**

296 **6**), plotting the actual family identity of leaves as a function of the proportion of their predicted  
297 family identity. Using persistent homology, there was a 27.3% correct plant family assignment  
298 rate of leaves. Using a bootstrapping approach permuting plant family identity against leaf  
299 shape information, a 27.3% correct reclassification rate or higher was never achieved in 1,000  
300 bootstrapped simulations, indicating that assignment is above chance. This outperforms  
301 traditional shape descriptor prediction (at a rate of 10.2%) by 2.7 times (**Table 2**), and including  
302 both persistent homology and traditional shape descriptor data only marginally increases the  
303 prediction rate (to 29.1%) over that of persistent homology alone (27.3%), indicating that  
304 persistent homology largely captures the same shape features as traditional descriptors, but  
305 provides additional information as well.

306  
307 Previous studies analyzing correlations between leaf shape with present and ancient climates  
308 debated the presence of “phylogenetic invariant” features that vary by climate, not  
309 phylogenetic context. The Climate dataset includes leaves from 75 sites throughout the world  
310 (**Table 1**). Like the phylogenetic prediction above, we sought to determine the degree that  
311 geographic location (regardless of plant family) can be predicted from shape alone. An LDA  
312 performed on PCs 1-191, representing >95% of the persistent homology morphospace variation  
313 for the Climate dataset, can predict the site where a leaf was collected (**Figure 7**) at a rate of  
314 14.5% (**Table 2**). Although much lower than the overall prediction rate by plant family (27.3%),  
315 a rate of 14.5% or higher was never achieved in 1,000 bootstrapped simulations, indicating that  
316 assignment is above chance. Persistent homology outperforms traditional shape descriptors (at  
317 a rate of 9.5%) by 1.5 times (**Table 2**), and including both persistent homology and traditional  
318 shape descriptor data only marginally increases the prediction rate (to 16.2%) over that of  
319 persistent homology alone (14.5%).

320  
321 Although the overall prediction rates of 27.3% for plant family and 14.5% for site collected are  
322 relatively low (**Table 2**), it is important to remember that they are above the level of chance  
323 (determined by bootstrapping, 1,000 simulations) and that the rates are not evenly distributed

324 across factor levels. Plant family prediction rates vary from 0-100%, and site collected  
325 prediction rates vary from 0-40% (**Figure 8**). The variability in rates is not overly influenced by  
326 sampling depth or variation within a group. For example, prediction rate of plant family and  
327 abundance are correlated at  $\rho = 0.37$ , and the correlation with median rank PC variance is  $\rho$   
328  $= -0.24$ . Although comprehensive, our dataset does not begin to encompass the total shape  
329 variation present in a plant family or region and there are undoubtedly collection biases in the  
330 data influencing prediction. Other factors than diversity within a group or the degree to which it  
331 is sampled, though, likely influence prediction rate too.

332

### 333 **Discussion**

334

335 We have presented a new morphometric method using persistent homology, a topological  
336 approach, that can comprehensively measure leaf shape. Other methods measure leaf shape  
337 comprehensively, including traditional landmarks, pseudo-landmarks, and Elliptical Fourier  
338 Descriptors (EFDs). However, no method comparatively analyzes the diverse *shapes* of leaves in  
339 seed plants (simple leaves, deeply lobed leaves, compound leaves of different shapes, leaves  
340 with differing numbers of leaflets or lobes, or large variation in petiole length and shape), only  
341 naturally varying leaves among related plant species. Other morphometric methods that only  
342 analyze the external contour of shapes are sensitive to artifacts, such as internal holes made by  
343 the overlap of leaflets or lobes, or small errors during thresholding and isolation. Finally,  
344 although appropriate for plant organs that can be represented by discrete shapes—like leaves,  
345 petals, seeds, or other lateral organs—current morphometric techniques fail to capture other  
346 attributes of plant architecture, like the branching patterns of roots, shoots, and inflorescences.  
347 A framework that can not only measure shape, but other features that are important to the  
348 plant form, is currently lacking.

349

350 By converting shapes into a topological space, as defined by a function that isolates subsets of  
351 the shape and describes it in terms of neighboring pixel density (**Figure 2**), the described

352 persistent homology approach can compare disparate leaf shapes across seed plants, allowing  
353 for the approximation of the overall leaf morphospace (**Figure 3**). By estimating pixel density,  
354 the method accommodates internal features (such as holes caused by leaflet overlap) or small  
355 processing artifacts, that do not unduly influence the output compared to the absence of such  
356 imperfections. The ability to compare shapes broadly and be robust against processing artifacts  
357 will enable large scale data analyses in the future, such as the analysis of digitized herbarium  
358 vouchers, ecological studies, or genetic and developmental insights into complex morphologies,  
359 for which current morphometric approaches are not designed. We detected clear differences in  
360 leaf shape between major phylogenetic groups (**Figure 4**) and estimated leaf shape diversity  
361 across plant families (**Figure 5**), demonstrating that a persistent homology approach is relevant  
362 for large-scale morphometric studies across plant evolution. The ability to comprehensively  
363 measure shapes permits alternative statistical approaches, moving beyond descriptive statistics  
364 used with traditional shape descriptors (**Figure 1**) and allowing for classifier and prediction  
365 approaches (**Figures 6-8; Table 2**). Theoretically, a unifying morphometric framework that can  
366 accommodate not only shapes but the branching architectures of plants, is lacking. As we have  
367 previously described, persistent homology functions are ideal to apply to branching plant  
368 structures as topological spaces (Li et al., 2017b). The morphometric approach described here  
369 applied to leaf shapes is compatible with similar persistent homology methods, creating a  
370 shared framework in which the plant form can be measured (Li et al., 2017a).

371

## 372 **Materials and Methods**

373

### 374 *Leaf shapes*

375

376 The 182,707 leaf outlines from 141 plant families from 75 sites throughout the world used in  
377 this manuscript are available to download (Chitwood, 2017a). This file directory includes x,y  
378 coordinates that form the outlines of the leaves. Separate folders contain text files with x,y  
379 coordinates for the leaves from each of the indicated groups in **Table 1**. Within each folder,

380 original x,y coordinates and scaled coordinates are provided. This dataset contains leaves from  
381 both published and unpublished sources (see text for details; Andres et al., 2017; Chitwood et  
382 al., 2012a; 2012b; 2012c; 2013; 2014; 2016a; 2016b; Chitwood and Otoni, 2017; Huff et al.,  
383 2003; Kumar et al., 2012; Li et al., 2017a; Martinez et al., 2016; Migicovsky et al., 2017; Peppe  
384 et al., 2011; Royer et al., 2005; Schmerler et al., 2012; *Arabidopsis* BA, RA, CB, ER, BZ; *Brassica*  
385 HA, SG, JCP; *Capsicum* TH, AVD; *Coleus* VC, MF, ML; grapevine and wild relatives VC, MF, LK, JL,  
386 AM; Poaceae LC, TG, PK; wild and cultivated potato DF, SJ; *Viburnum* MD, EE, SS, ES).

387

388 *Persistent homology*

389

390 The MATLAB code necessary to recapitulate the persistent homology analysis in this manuscript  
391 can be found in the following GitHub repository (Li, 2017):

392 <https://github.com/maoli0923/Persistent-Homology-All-Leaf>

393

394 Persistent homology is a flexible method to quantify branching structures (Edelsbrunner and  
395 Harer, 2008; Weinberger, 2011; Li et al., 2017b), point clouds (Ghrist, 2008), two-dimensional  
396 and three-dimensional shapes (Gamble and Heo, 2010), and textures (Mander et al., 2013;  
397 2017). Each of these different phenotypes can be described by a multidimensional vector (e.g.  
398 Euler characteristic curve), integrating how homology (e.g. path-connected components)  
399 persists across the scales of a tailored mathematical function.

400

401 Leaf contours are represented as two-dimensional point clouds extracted from binary images  
402 (**Figure 2A**). We use a Gaussian density estimator, which can be directly derived from the point  
403 cloud and is also robust to noise, to estimate the neighborhood density of each pixel. Denser  
404 point regions, such as serrations, lobes, or the attachment points of leaflets, have higher  
405 function values (**Figure 2B**). Formally, the Gaussian density estimator is defined as

406 
$$\varphi(x) := \frac{1}{n} \sum_{i=1}^n \frac{1}{\sqrt{2\pi}} e^{-\frac{1}{2} \left(\frac{x-y_i}{h}\right)^2},$$
 where  $y_1, \dots, y_n$  are the data points and  $h$  is a bandwidth

407 parameter. Because a set of local and regional topologies may often be more effective to  
408 represent shapes, we use a local persistent homology technique to subset the density estimator  
409 into 16 concentric annuli centered around the centroid of the leaf (**Figures 2A, D**). To achieve  
410 this, we multiply this function by a “bump” function  $K$  which highlights an annulus, defined as  
411 
$$K_{\sigma,t,y}(x) := e^{-\frac{(d(x,y)-t\sigma)^2}{2\sigma^2}}$$
, where  $y$  is the center of the annulus,  $t\sigma$  determines its radius, and the  
412 parameter  $\sigma$  is its width (**Figure 2C**). Each local function emphasizes the density function falling  
413 in the annulus. Given a threshold and a local function, the points whose function values are  
414 greater than this threshold form a subset (superlevel set). Changing this threshold value from  
415 the maximum function value to its minimum value, we can get an expanding sequence of  
416 subsets, or a superlevel set filtration. **Figure 2E** shows the shapes above a plane, an example of  
417 a superlevel set filtration. For each subset, we calculate the Euler characteristic, which equals  
418 the number of connected components minus the number of holes. Thus, for a sequence of  
419 subsets, we get a sequence of numbers (a multidimensional vector). All 16 annuli derive 16  
420 multidimensional vectors which are concatenated into an overall vector used for analysis.  
421 Principal Component Analysis (PCA) was performed in MATLAB on the vectors and PC scores  
422 and percent variance explained by each PC used in subsequent analyses.

423

#### 424 *Statistical analysis and visualization*

425

426 The R code (R Core Team, 2017) and data necessary to recapitulate the statistical analyses and  
427 figures in this manuscript can be found as a zipped folder directory on figshare (Chitwood,  
428 2017b): <https://figshare.com/articles/LeafMorphospace/4985561/1>

429

430 Unless otherwise specified, all graphs were visualized using ggplot2 (Wickham, 2016).

431 Scatterplots were visualized using the `geom_point()` function, density plots were visualized with  
432 the `geom_density2d()` function, heatmaps were visualized using the `geom_tile()` function, and  
433 colors were selected from ColorBrewer (Harrower and Brewer, 2003) and viridis (Garnier,

434 2017). Other visualization functions used and specific parameters that can be found in the code  
435 used to generate the figures (Chitwood, 2017b).

436

437 Variance was calculated for each plant family for each principal component using `var()` and  
438 families ranked for each principal component using `rank()` (**Figure 5**). Linear regression was  
439 performed using `lm()` and residuals retrieved to estimate leaf shape diversity for each plant  
440 family (**Figure S1**). The Wilcoxon signed rank test was performed using `wilcox.test()` to test for  
441 higher or lower than expected phylogenetic diversity using a two-sided test with  $\mu = 0$ . Linear  
442 Discriminant Analysis (LDA) was performed using the `lda()` function in the package MASS  
443 (Venables and Ripley, 2002). LDA was performed using the number of principal components  
444 that contributed at least 95% of all variance in each analysis (PCs 1-179 for phylogenetic  
445 prediction and PCs 1-191 for site prediction). The Leafsnap and Climate datasets were used for  
446 phylogenetic prediction (**Figure 6**) whereas just the Climate dataset was used for site prediction  
447 (**Figure 7**). Prediction using the discriminant space was performed using `CV = TRUE` for a “leave  
448 one out” cross-validated jack-knifed approach and the priors set equal across factor levels. Both  
449 the phylogenetic and site LDA prediction rates were bootstrapped over 1,000 simulations. A for  
450 loop was used, permuting family or site identity against leaf identity, performing an LDA on the  
451 permuted data, and recording the correct prediction rate for each permuted simulation. For  
452 both the phylogenetic and site predictions, a permuted correct prediction rate (out of 1,000  
453 simulations) higher than the actual correct prediction rate was never detected.

454

## 455 **References**

456

457 Andres RJ, Coneva V, Frank MH, Tuttle JR, Samayoa LF, Han SW, Kaur B, Zhu LL, Fang H,  
458 Bowman DT, Rojas-Pierce M. Modifications to a *LATE MERISTEM IDENTITY1* gene are  
459 responsible for the major leaf shapes of Upland cotton (*Gossypium hirsutum* L.). Proceedings of  
460 the National Academy of Sciences of the United States of America. 2017 Jan 3;114(1):E57-66.

461

462 Bensmihen S, Hanna AI, Langlade NB, Micol JL, Bangham A, Coen ES. Mutational spaces for leaf  
463 shape and size. HFSP Journal. 2008 Apr 1;2(2):110-20.

464

465 Bookstein FL. Morphometric tools for landmark data: geometry and biology. Cambridge



466 University Press; 1997 Jun 28.  
467  
468 Chitwood DH, Naylor DT, Thammapijai P, Weeger AC, Headland LR, Sinha NR. Conflict  
469 between intrinsic leaf asymmetry and phyllotaxis in the resupinate leaves of *Alstroemeria*  
470 *psittacina*. *Frontiers in Plant Science*. 2012a Aug 10;3:182.  
471  
472 Chitwood DH, Headland LR, Filiault DL, Kumar R, Jiménez-Gómez JM, Schragger AV, Park DS,  
473 Peng J, Sinha NR, Maloof JN. Native environment modulates leaf size and response to simulated  
474 foliar shade across wild tomato species. *PLoS One*. 2012b Jan 12;7(1):e29570.  
475  
476 Chitwood DH, Headland LR, Kumar R, Peng J, Maloof JN, Sinha NR. The developmental  
477 trajectory of leaflet morphology in wild tomato species. *Plant Physiology*. 2012c Mar  
478 1;158(3):1230-40.  
479  
480 Chitwood DH, Kumar R, Headland LR, Ranjan A, Covington MF, Ichihashi Y, Fulop D, Jiménez-  
481 Gómez JM, Peng J, Maloof JN, Sinha NR. A quantitative genetic basis for leaf morphology in a  
482 set of precisely defined tomato introgression lines. *The Plant Cell*. 2013 Jul 1;25(7):2465-81.  
483  
484 Chitwood DH, Ranjan A, Martinez CC, Headland LR, Thiem T, Kumar R, Covington MF, Hatcher T,  
485 Naylor DT, Zimmerman S, Downs N. A modern ampelography: a genetic basis for leaf shape and  
486 venation patterning in grape. *Plant Physiology*. 2014;164(1):259-72.  
487  
488 Chitwood DH, Klein LL, O'Hanlon R, Chacko S, Greg M, Kitchen C, Miller AJ, Londo JP. Latent  
489 developmental and evolutionary shapes embedded within the grapevine leaf. *New Phytologist*.  
490 2016a Apr 1;210(1):343-55.  
491  
492 Chitwood DH, Rundell SM, Li DY, Woodford QL, Tommy TY, Lopez JR, Greenblatt D, Kang J,  
493 Londo JP. Climate and developmental plasticity: interannual variability in grapevine leaf  
494 morphology. *Plant Physiology*. 2016b Mar 1;170(3):1480-91.  
495  
496 Chitwood DH, Otoni WC. Morphometric analysis of *Passiflora* leaves: the relationship between  
497 landmarks of the vasculature and elliptical Fourier descriptors of the blade. *Gigascience*. 2017  
498 Jan 1;6(1):1-13.  
499  
500 Chitwood DH. Leaf\_coordinates. Figshare. 2017a. Accessed June 17, 2017.  
501 <https://doi.org/10.6084/m9.figshare.5056441.v1>  
502  
503 Chitwood DH. LeafMorphospace. Figshare. 2017b. Accessed May 29, 2017.  
504 <https://doi.org/10.6084/m9.figshare.4985561.v1>  
505  
506 Edelsbrunner H, Harer J. Persistent homology-a survey. *Contemporary mathematics*. 2008 Feb  
507 29;453:257-82.

508  
509 Freeman H. Computer processing of line-drawing images. *ACM Computing Surveys (CSUR)*.  
510 1974 Mar 1;6(1):57-97.  
511  
512 Gamble J, Heo G. Exploring uses of persistent homology for statistical analysis of landmark-  
513 based shape data. *Journal of Multivariate Analysis*. 2010 Oct 31;101(9):2184-99.  
514  
515 Garnier S. viridis: Default Color Maps from 'matplotlib'. R package version 0.4.0. 2017  
516 <https://CRAN.R-project.org/package=viridis>  
517  
518 Ghrist R. Barcodes: the persistent topology of data. *Bulletin of the American Mathematical*  
519 *Society*. 2008;45(1):61-75.  
520  
521 Gower JC. Generalized procrustes analysis. *Psychometrika*. 1975 Mar 27;40(1):33-51.  
522  
523 Harrower M, Brewer CA. ColorBrewer. org: an online tool for selecting colour schemes for  
524 maps. *The Cartographic Journal*. 2003 Jun 1;40(1):27-37.  
525  
526 Huff PM, Wilf P, Azumah EJ. Digital future for paleoclimate estimation from fossil leaves?  
527 Preliminary results. *Palaios*. 2003 Jun;18(3):266-74.  
528  
529 Kuhl FP, Giardina CR. Elliptic Fourier features of a closed contour. *Computer Graphics and*  
530 *Image Processing*. 1982 Mar 1;18(3):236-58.  
531  
532 Kumar N, Belhumeur P, Biswas A, Jacobs D, Kress WJ, Lopez I, Soares J. Leafsnap: A computer  
533 vision system for automatic plant species identification. *Computer Vision–ECCV 2012*.  
534 2012:502-16.  
535  
536 Langlade NB, Feng X, Dransfield T, Copsey L, Hanna AI, Thébaud C, Bangham A, Hudson A, Coen  
537 E. Evolution through genetically controlled allometry space. *Proceedings of the National*  
538 *Academy of Sciences of the United States of America*. 2005 Jul 19;102(29):10221-6.  
539  
540 Li M, Frank MH, Coneva V, Mio W, Topp CN, Chitwood DH. Persistent homology: a tool to  
541 universally measure plant morphologies across organs and scales. *bioRxiv*. 2017a  
542 <https://doi.org/10.1101/104141>  
543  
544 Li M, Duncan K, Topp CN, Chitwood DH. Persistent homology and the branching topologies of  
545 plants. *American Journal of Botany*. 2017b 104(3):349-353.  
546  
547 Li M. Persistent-Homology-All-Leaf. GitHub. 2017. Accessed May 29, 2017.  
548 <https://github.com/maoli0923/Persistent-Homology-All-Leaf>  
549

550 Mander L, Li M, Mio W, Fowlkes CC, Punyasena SW. Classification of grass pollen through the  
551 quantitative analysis of surface ornamentation and texture. *Proceedings of the Royal Society of*  
552 *London B: Biological Sciences*. 2013 Nov 7;280(1770):20131905.  
553  
554 Mander L, Dekker SC, Li M, Mio W, Punyasena SW, Lenton TM. A morphometric analysis of  
555 vegetation patterns in dryland ecosystems. *Royal Society Open Science*. 2017 Feb  
556 1;4(2):160443.  
557  
558 Martinez CC, Chitwood DH, Smith RS, Sinha NR. Left–right leaf asymmetry in decussate and  
559 distichous phyllotactic systems. *Philosophical Transactions of the Royal Society* 2016 Dec  
560 19;371(1710):20150412.  
561  
562 Migicovsky Z, Li M, Chitwood DH, Myles S. Morphometrics reveals complex and heritable apple  
563 leaf shapes. *bioRxiv*. 2017 <https://doi.org/10.1101/139303>  
564  
565 Peppe DJ, Royer DL, Cariglino B, Oliver SY, Newman S, Leight E, Enikolopov G, Fernandez-Burgos  
566 M, Herrera F, Adams JM, Correa E. Sensitivity of leaf size and shape to climate: global patterns  
567 and paleoclimatic applications. *New Phytologist*. 2011 May 1;190(3):724-39.  
568  
569 R Core Team. R: A language and environment for statistical computing. R Foundation for  
570 Statistical Computing. 2017. Vienna, Austria. Accessed May 29, 2017. [https://www.R-](https://www.R-project.org/)  
571 [project.org/](https://www.R-project.org/)  
572  
573 Royer DL, Wilf P, Janesko DA, Kowalski EA, Dilcher DL. Correlations of climate and plant ecology  
574 to leaf size and shape: potential proxies for the fossil record. *American Journal of Botany*. 2005  
575 Jul 1;92(7):1141-51.  
576  
577 Schmerler SB, Clement WL, Beaulieu JM, Chatelet DS, Sack L, Donoghue MJ, Edwards EJ.  
578 Evolution of leaf form correlates with tropical–temperate transitions in *Viburnum* (Adoxaceae).  
579 *Proceedings of the Royal Society of London B: Biological Sciences*. 2012 Oct 7;279(1744):3905-  
580 13.  
581  
582 Venables WN, Ripley BD. *Modern Applied Statistics with S*. Springer; 2017 New York  
583  
584 Weinberger S. What is... persistent homology? *Notices of the AMS*. 2011 Jan;58(1):36-9.  
585  
586 Wickham H. *ggplot2: elegant graphics for data analysis*. Springer; 2016 Jun 8 New York  
587  
588 Wilf P, Zhang S, Chikkerur S, Little SA, Wing SL, Serre T. Computer vision cracks the leaf code.  
589 *Proceedings of the National Academy of Sciences of the United States of America*. 2016 Mar  
590 7:201524473.  
591

592

593 **Figure Legends:**

594

595 **Figure 1: Traditional shape descriptors delimit leaves from different taxonomic groups. A)**  
596 **Circularity vs. 1/Aspect Ratio, B) Solidity<sup>8</sup> vs. 1/Aspect Ratio, and C) Circularity vs. Solidity<sup>8</sup>.** Left:  
597 Scatter plots of 182,707 leaves analyzed, from 141 plant families from 75 sites throughout the  
598 world. Right: For select taxonomic groups, density plots showing ability of traditional shape  
599 descriptors to delimit different leaf shapes and distributions of different groups. Solidity and  
600 Aspect Ratio values have been transformed to yield more even distributions. Taxonomic groups  
601 are indicated by color and silhouettes of representative leaves close to the overall mean of  
602 descriptor values provided.

603

604 **Figure 2: Persistent homology and leaf shape. A)** Contours of a simple leaf (top), compound  
605 pinnate leaf (middle), and compound palmate leaf with a hole and overlap in leaflets (bottom).  
606 16 annuli used to isolate pixel density are shown, with annulus 10 used in subsequent panels  
607 indicated in green. **B)** Colormap of a Gaussian density estimator that is robust to noise. Red  
608 indicates a larger density of neighboring pixels and blue less density. **C)** An annulus kernel is  
609 used to localize and smoothen data. **D)** Multiplication of the annulus kernel with the density  
610 estimator isolates density features of the leaf contour. **E)** Side view of the annulus kernel-  
611 isolated density features of the leaf. The high peaks in red indicate higher pixel density. **F)** A  
612 plane traverses the density function from the highest to lowest densities (x axis). As the plane  
613 traverses the function, the topological space is recorded as the number of connected  
614 components above the plane at any given point, the Euler characteristic (y axis). Three pink  
615 dotted lines correspond to the plane at three points along the density function, which are  
616 visualized below the graphs. Together, similar curves from the 16 annuli comprise the  
617 persistent homology description of leaf shape.

618

619 **Figure 3: Principal Component Analysis (PCA) of persistent homology results.** Principal

620 Component 2 (PC2) vs. PC1 based on persistent homology results for 182,707 leaves colored by  
621 **A) 1/Aspect Ratio, B) Circularity, and C) Solidity**<sup>8</sup>. Aspect Ratio and Solidity values have been  
622 transformed to yield more even distributions. Note non-linear relationships between traditional  
623 shape descriptors and persistent homology PCs. **D) Correlations between aspect ratio,**  
624 **circularity, and solidity and PCs 1-69 (representing 90% of variation).** Positive and negative  
625 Spearman's rho values are indicated as blue and yellow, respectively. **E) Density plots show**  
626 **distributions of selected taxonomic groups in persistent homology PCA and F) Climate and**  
627 **Leafsnap datasets, representing 141 plant families from 75 sites throughout the world, are**  
628 **superimposed as black dots. Taxonomic groups are indicated by color and silhouettes of**  
629 **representative leaves close to the overall mean of descriptor values provided.**

630

631 **Figure 4: Differences in leaf shape between phylogenetic groups.** Gymnosperm, magnoliid,  
632 rosid I, rosid II, asterid I, and asterid II leaves (left to right) are each plotted in blue against all  
633 samples (gray) for **A) PC2 vs. PC1, B) PC4 vs. PC3, C) PC6 vs. PC5, D) PC8 vs. PC9, and E) PC10 vs.**  
634 **PC9.** Percent variance explained by each PC is indicated.

635

636 **Figure 5: Highly variable plant families are variable across Principal Components (PCs) and**  
637 **estimates of leaf shape diversity by family. A) Variance was measured for each plant family**  
638 **and then ranked from most variable (yellow) to least variable (black) for each PC. Plant families**  
639 **are ordered by abundance, as seen in the bar graph (right) indicating count number in the**  
640 **dataset. The most abundant plant families in the dataset tend to be the most variable. B) Linear**  
641 **regression was used to model the -median variance ranking for each plant family as a function**  
642 **of  $\log_{10}(\text{count})$ . The residuals are estimates of plant family leaf shape diversity, as corrected for**  
643 **representation in the dataset. Higher residual values indicate higher estimated leaf shape**  
644 **diversity. Gymnosperms, orange; magnoliids, yellow; rosids I, light blue; rosids II, dark blue;**  
645 **asterids I, light green; asterids II, dark green; other groups, gray.**

646

647 **Figure 6: Predicting plant family using persistent homology.** Using persistent homology data

648 from the Climate and Leafsnap datasets, a Linear Discriminant Analysis (LDA) was used as a  
649 classifier to predict plant family, cross-validated using a jackknifed “leave one out” approach.  
650 The vertical axis indicates actual plant family and the horizontal axis predicted plant family.  
651 Color indicates proportion of leaves from each actual plant family assigned to each predicted  
652 family, such that proportions across the horizontal axis sum to 1. Black indicates no assignment.  
653 A phylogeny indicating key taxonomic groups is provided.

654

655 **Figure 7: Predicting collection site using persistent homology.** Using persistent homology data  
656 from the Climate dataset, a Linear Discriminant Analysis (LDA) was used as a classifier to predict  
657 collection site, cross-validated using a jackknifed “leave one out” approach. The vertical axis  
658 indicates actual collection site and the horizontal axis predicted collection site. Color indicates  
659 proportion of leaves from each actual collection site assigned to each predicted collection site,  
660 such that proportions across the horizontal axis sum to 1. Black indicates no assignment. Sites  
661 are grouped into nine different regions that are indicated by color on a map.

662

663 **Figure 8: Prediction rates using persistent homology data across plant families and collection**  
664 **sites. A)** Proportion of leaves from each family correctly assigned. Red line indicates overall  
665 correct prediction rate of plant family of 27.3%. Phylogeny and major taxonomic groups are  
666 indicated. **B)** Proportion of leaves from each collection site correctly assigned. Red line indicates  
667 overall correct prediction rate of collection site of 14.5%. Collection sites are grouped by region,  
668 indicated by color.

669

670 **Supplemental figure legend:**

671

672 **Supplemental Figure 1: Linear relationship between median ranked variability and count.**

673 Linear regression was used to model -median rank variability (higher values indicated more  
674 variability within a plant family) as of function of the abundance of each plant family in the  
675 dataset, as measured by  $\log_{10}$ (leaf count). The model (shown in blue) was used to estimate

676 overall leaf shape variance in plant family, as corrected for sampling depth, by using the  
 677 residuals from the model as an indication of diversity.

678

679 **Table 1:** Leaf counts of datasets.

| Leaf type           | Count   |
|---------------------|---------|
| <i>Alstroemeria</i> | 2,392   |
| Apple               | 9,619   |
| <i>Arabidopsis</i>  | 5,101   |
| <i>Brassica</i>     | 1,832   |
| <i>Capsicum</i>     | 3,277   |
| Climate             | 5,812   |
| <i>Coleus</i>       | 34,607  |
| Cotton              | 2,885   |
| Grapevine           | 20,121  |
| <i>Hedera</i>       | 865     |
| Leafsnap            | 5,733   |
| <i>Passiflora</i>   | 3,301   |
| Poaceae             | 866     |
| Potato              | 1,840   |
| Tomato              | 82,034  |
| <i>Viburnum</i>     | 2,422   |
| Total               | 182,707 |

701

702 **Table 2:** Overall prediction rates of plant family and collection site using different  
 703 morphometric methods

704

| Prediction   | Datasets          | Method                  | Correct |
|--------------|-------------------|-------------------------|---------|
| Plant family | Climate, Leafsnap | Persistent homology     | 27.3%   |
| Plant family | Climate, Leafsnap | Traditional descriptors | 10.2%   |
| Plant family | Climate, Leafsnap | Both methods            | 29.1%   |
| Site         | Climate           | Persistent homology     | 14.5%   |
| Site         | Climate           | Traditional descriptors | 9.5%    |
| Site         | Climate           | Both methods            | 16.2%   |

705

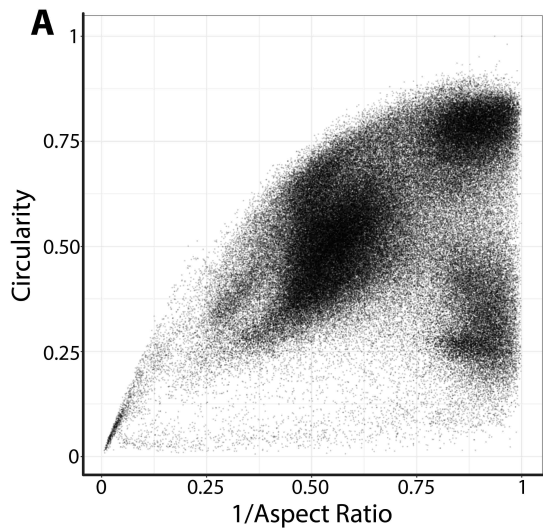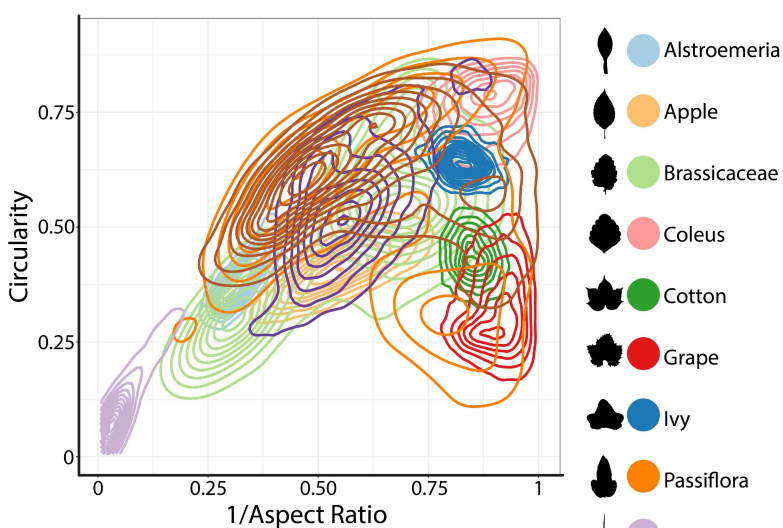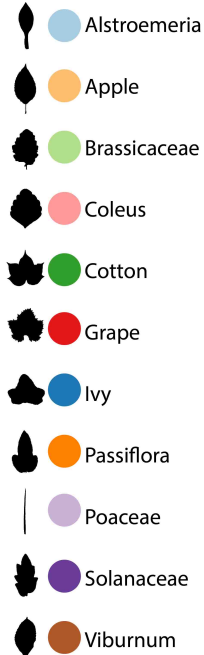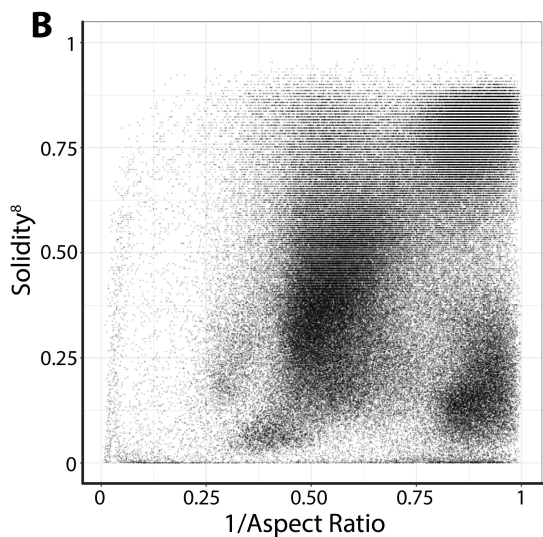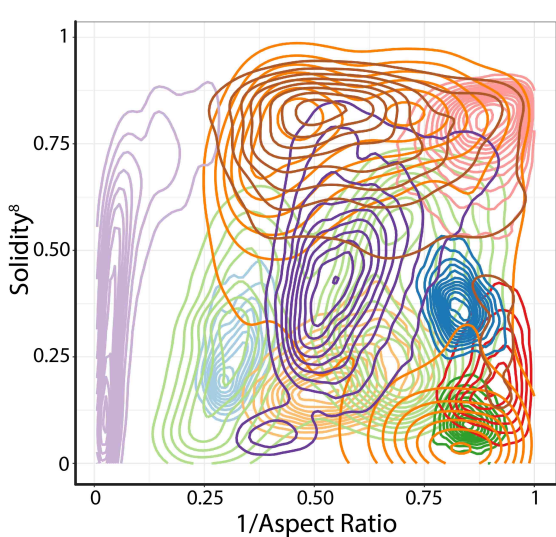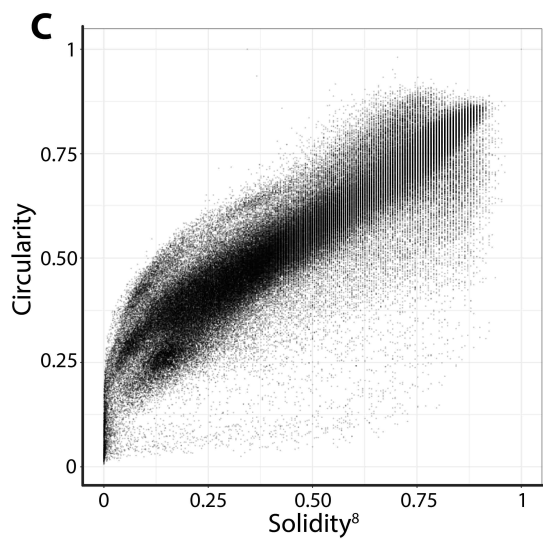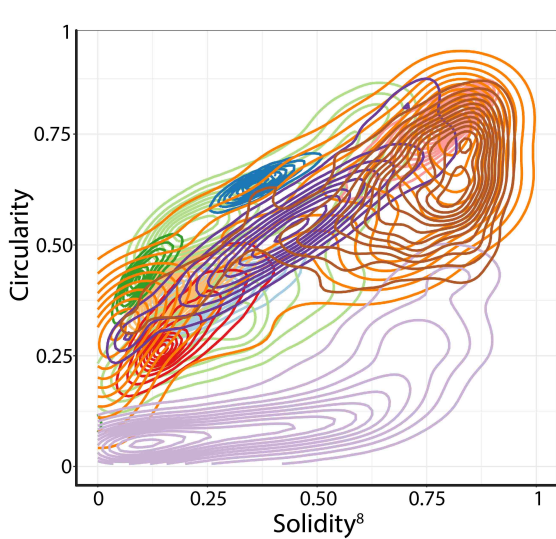



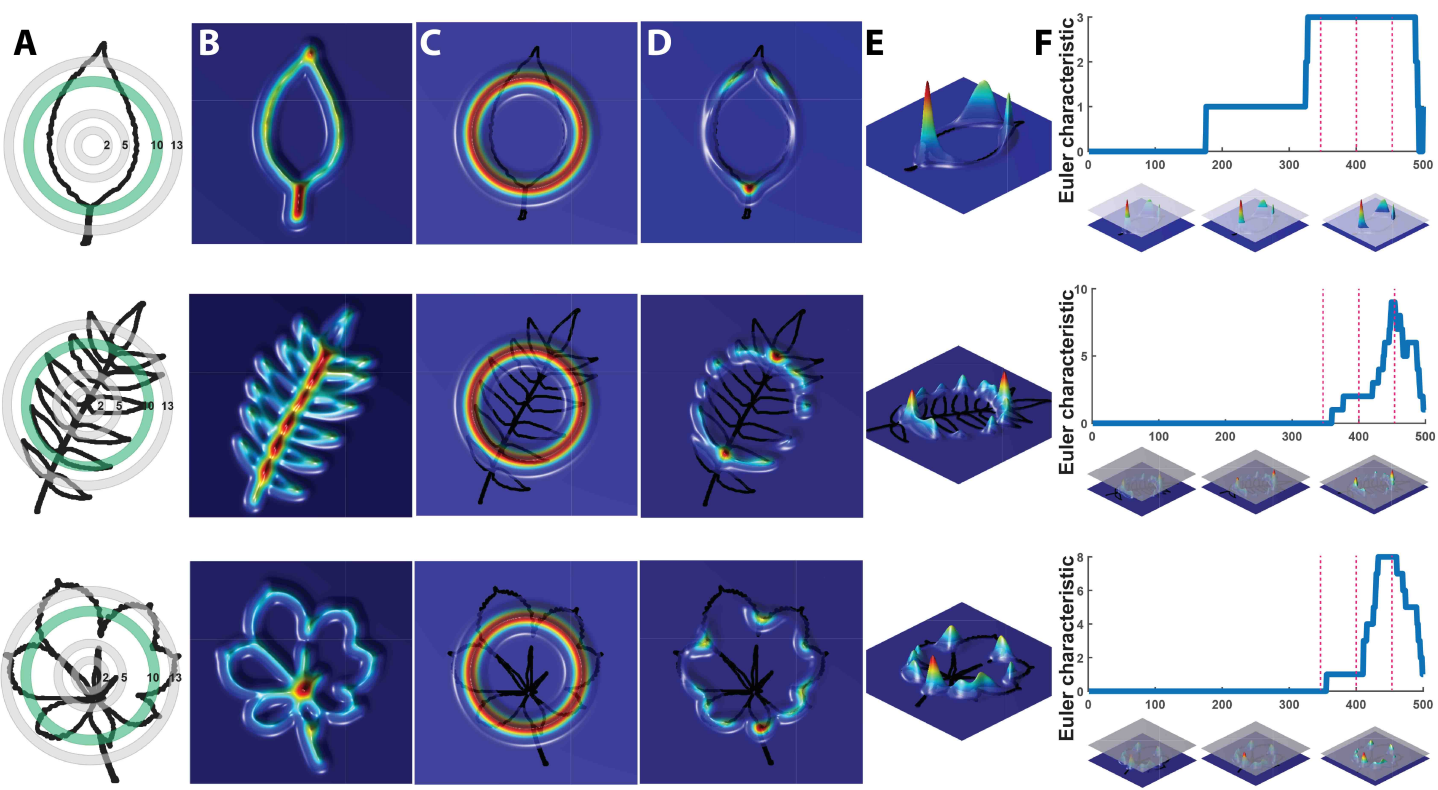

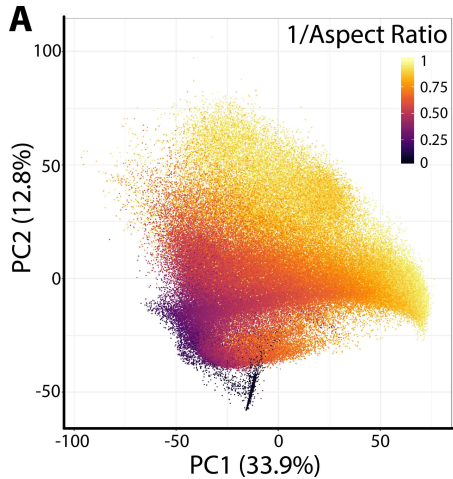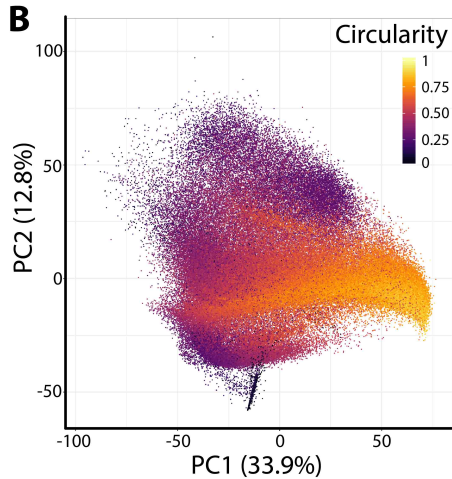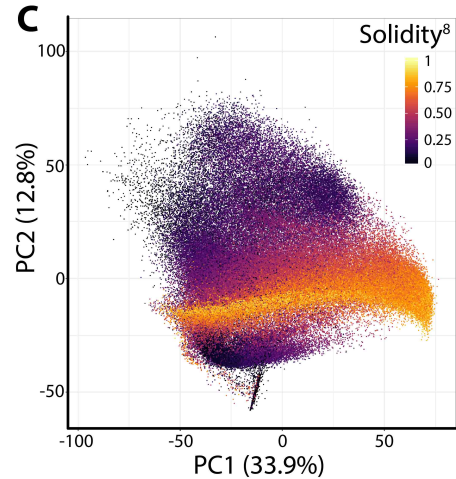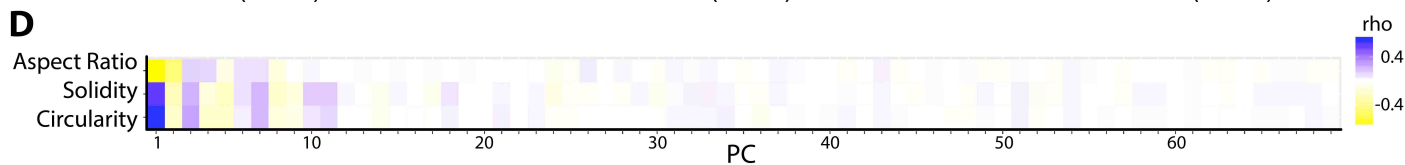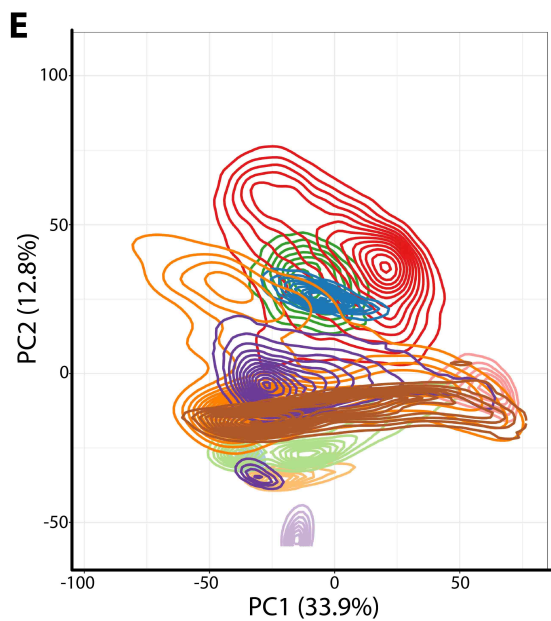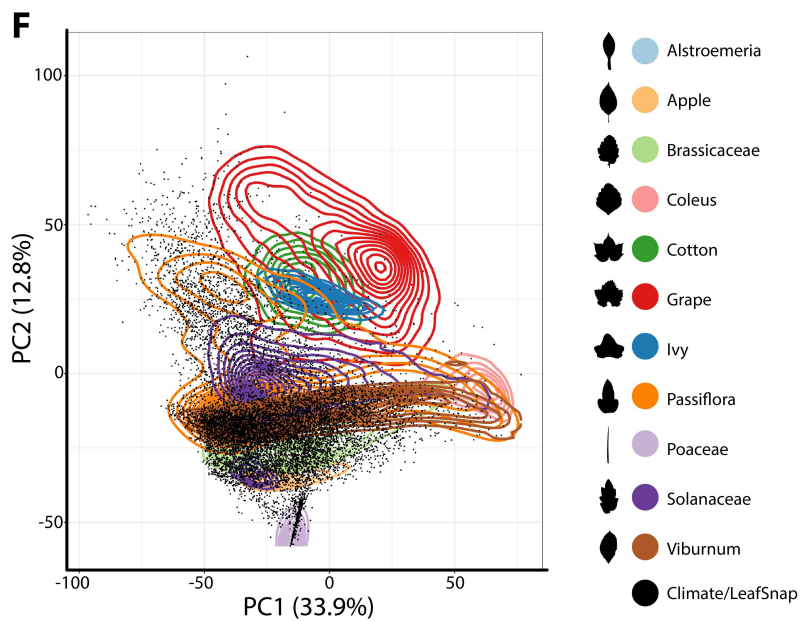

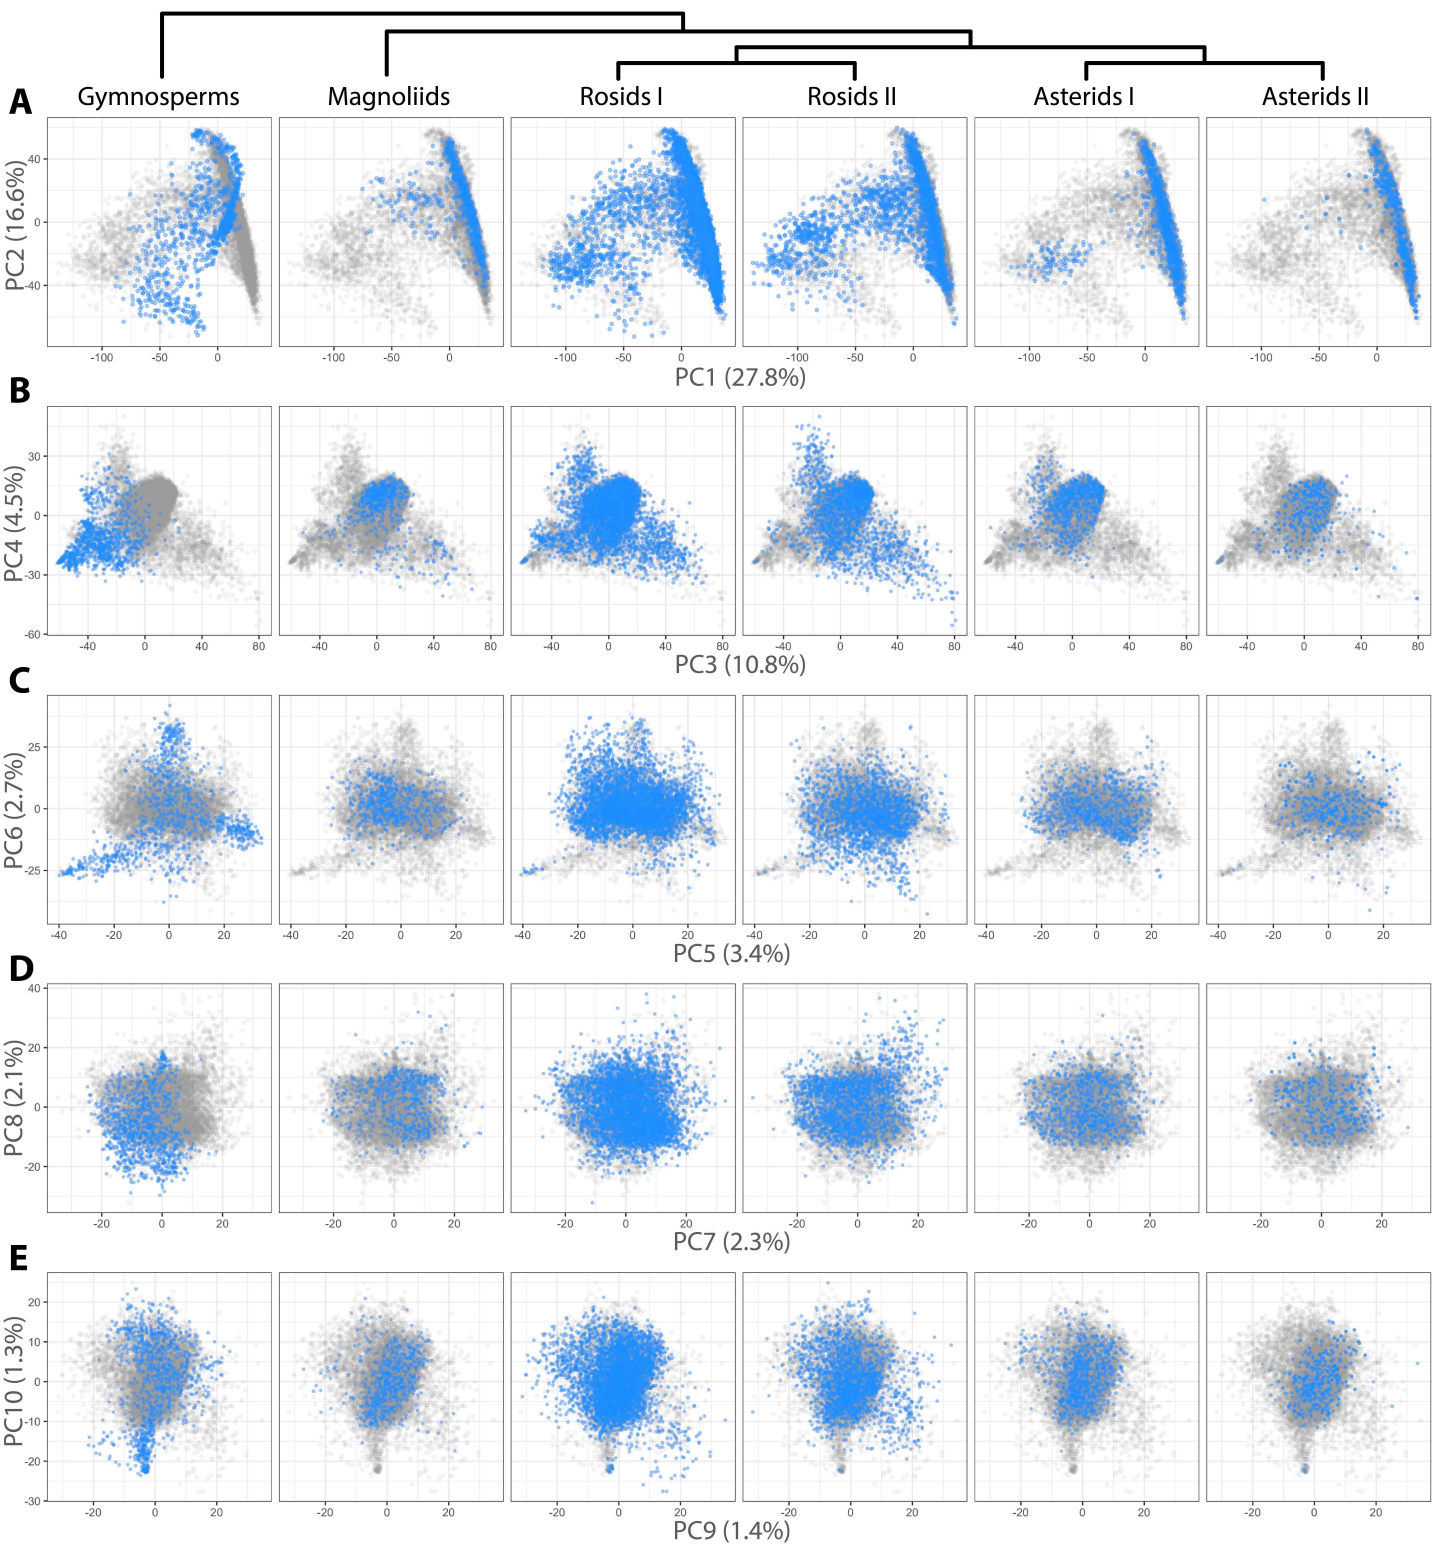

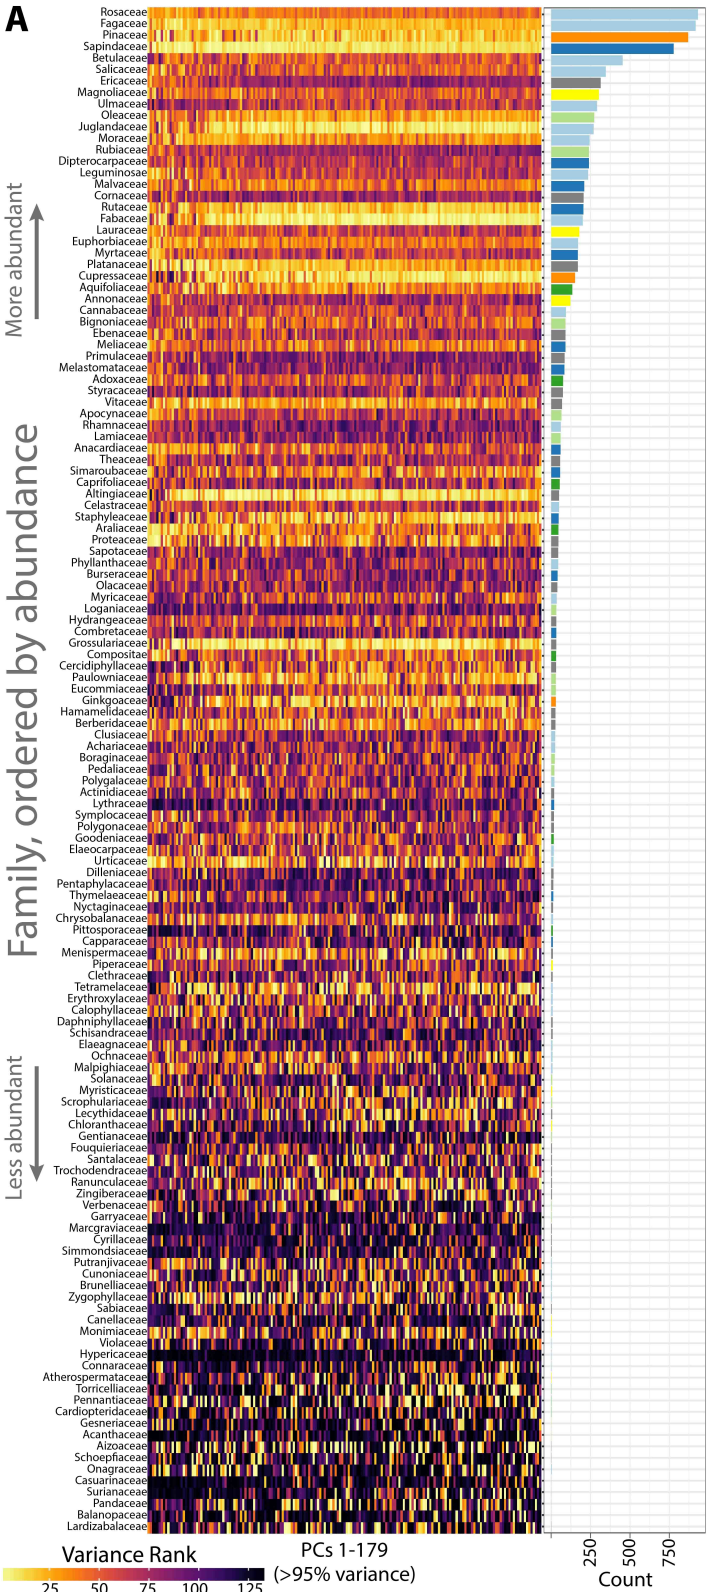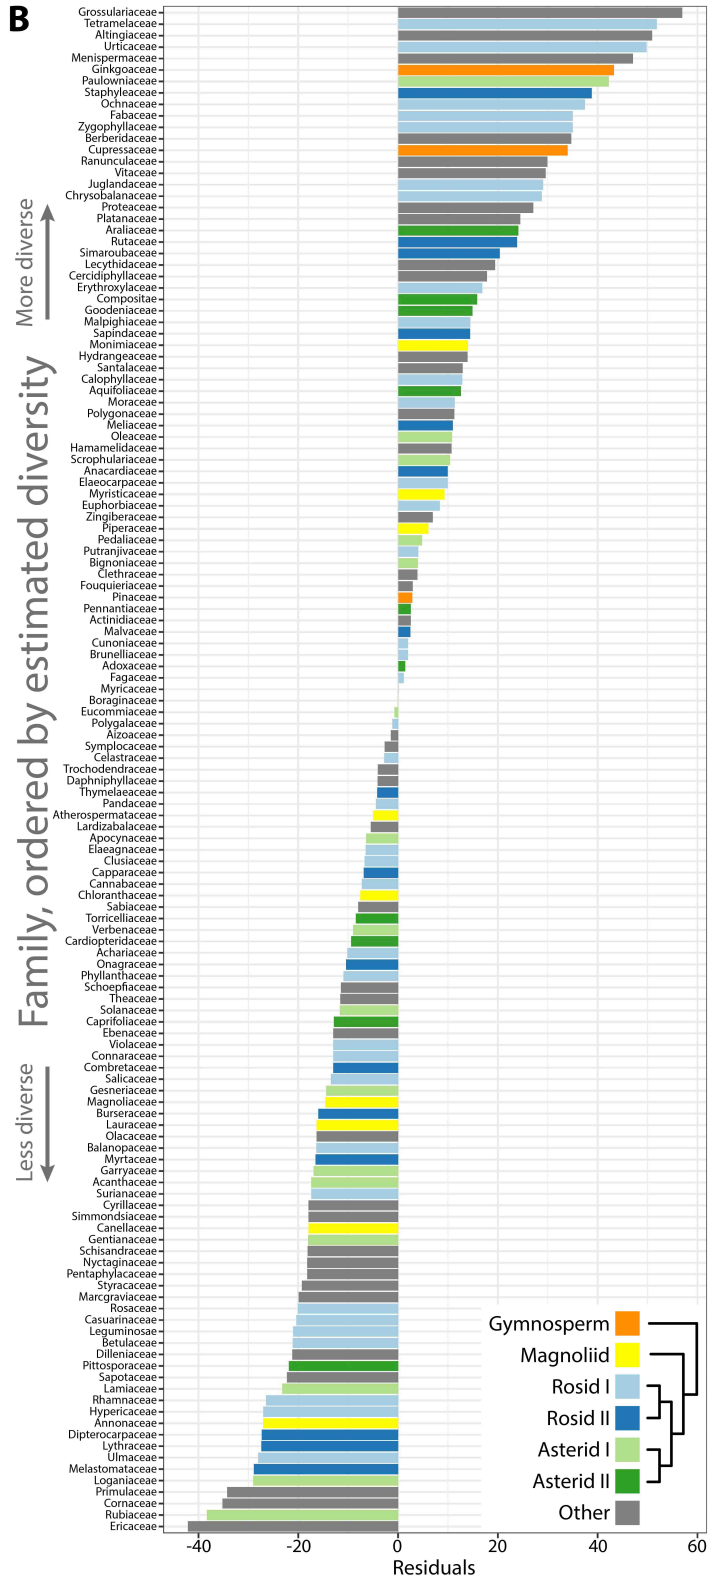



Proportion assigned

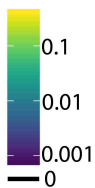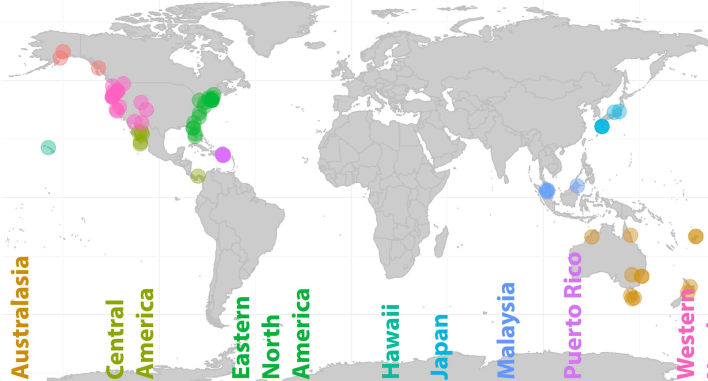

Actual site

Western North America

Puerto Rico

Malaysia

Japan

Hawaii

Eastern North America

Central America

Australasia

Alaska

wolf\_creek\_colorado  
three\_lmn\_clickamas\_river\_oregon  
santa\_cruz\_new\_brighton\_state\_beach\_california  
republic\_north\_fork\_of\_sanpoil\_river\_washington  
red\_feet\_reservoir\_utah  
powers\_coquille\_river\_oregon  
portal\_arizona  
placerville\_california  
north\_bend\_oregon  
nestucca\_river\_oregon  
hood\_river\_oregon  
half\_moon\_bay\_california  
government\_camp\_multitorpor\_mountain\_oregon  
clearwater\_washington  
childs\_arizona  
cape\_blanco\_oregon  
bandon\_oregon  
toro\_negro\_state\_forest  
monte\_guilarte\_in\_guilarte\_commonwealth\_forest  
guanica\_state\_forest  
guajataca  
cabo\_rojo\_in\_borinquen\_state\_forest  
buena\_vista\_in\_maricao\_state\_forest  
borinquen\_in\_guanica\_state\_forest  
pasoh\_forest\_reserve  
frim\_kepong  
danum\_valley\_field\_center\_borneo  
yakusugi\_800m\_yakushima  
yakusugi\_260m\_yakushima  
yakusugi\_1350m\_yakushima  
yakusugi\_1080m\_yakushima  
suganuma\_honshu  
nagakubo\_yakushima  
chuzenji\_ko\_honshu  
williwil\_nui\_ridge\_trail\_ohau  
smithsonian\_environmental\_research\_center\_maryland  
little\_pee\_dee\_state\_park\_south\_carolina  
institute\_for\_ecosystem\_studies\_new\_york  
hubbard\_brook\_experimental\_forest\_new\_hampshire  
hawk\_mountain\_sanctuary\_pennsylvania  
harvard\_forest\_machusetts  
florida\_panther\_national\_wildlife\_refuge\_florida  
e\_n\_huyck\_preserve\_and\_biological\_research\_station\_new\_york  
duke\_forest\_north\_carolina  
dilchers\_woods\_upland\_gainesville\_florida  
dilchers\_woods\_lowland\_gainesville\_florida  
connecticut\_river\_upland\_near\_middletown\_connecticut  
connecticut\_river\_swamp\_near\_middletown\_connecticut  
connecticut\_river\_near\_middletown\_connecticut  
cockaponset\_state\_forest\_connecticut  
big\_hammock\_natural\_and\_wildlife\_management\_area\_georgia  
archbold\_biological\_station\_florida  
allegheyn\_national\_forest\_pennsylvania  
san\_bartolo\_baja\_california\_sur\_mexico  
nari\_sonora\_mexico  
empalme\_sonora\_mexico  
cabo\_san\_lucas\_baja\_california\_sur\_mexico  
barro\_colorado\_island\_panama  
siamos\_sonora\_mexico  
seqapa\_cakaudrove\_province\_fiji  
round\_hill\_nature\_reserve\_mallee\_south\_wales\_australia  
okataina\_new\_zealand  
noah\_creek\_queensland\_australia  
mt\_read\_tasmania\_australia  
margaret\_creek\_western\_australia  
mt\_read\_tasmania\_australia  
noah\_creek\_queensland\_australia  
seqapa\_cakaudrove\_province\_fiji  
barro\_colorado\_island\_panama  
cabo\_san\_lucas\_baja\_california\_sur\_mexico  
nari\_sonora\_mexico  
empalme\_sonora\_mexico  
san\_bartolo\_baja\_california\_sur\_mexico  
allegheyn\_national\_forest\_pennsylvania  
archbold\_biological\_station\_florida  
big\_hammock\_natural\_and\_wildlife\_management\_area\_georgia  
connecticut\_river\_near\_middletown\_connecticut  
connecticut\_river\_swamp\_near\_middletown\_connecticut  
connecticut\_river\_upland\_near\_middletown\_connecticut  
dilchers\_woods\_upland\_gainesville\_florida  
dilchers\_woods\_lowland\_gainesville\_florida  
duke\_forest\_north\_carolina  
e\_n\_huyck\_preserve\_and\_biological\_research\_station\_new\_york  
florida\_panther\_national\_wildlife\_refuge\_florida  
harvard\_forest\_machusetts  
hawk\_mountain\_sanctuary\_pennsylvania  
hubbard\_brook\_experimental\_forest\_new\_hampshire  
institute\_for\_ecosystem\_studies\_new\_york  
little\_pee\_dee\_state\_park\_south\_carolina  
smithsonian\_environmental\_research\_center\_maryland  
williwil\_nui\_ridge\_trail\_ohau  
nagakubo\_yakushima  
nagakubo\_yakushima  
suganuma\_honshu  
yakusugi\_1080m\_yakushima  
yakusugi\_1350m\_yakushima  
yakusugi\_260m\_yakushima  
yakusugi\_800m\_yakushima  
danum\_valley\_field\_center\_borneo  
pasoh\_forest\_reserve  
frim\_kepong  
borinquen\_in\_guanica\_state\_forest  
buena\_vista\_in\_maricao\_state\_forest  
cabo\_rojo\_in\_borinquen\_state\_forest  
guajataca  
guanica\_state\_forest  
monte\_guilarte\_in\_guilarte\_commonwealth\_forest  
toro\_negro\_state\_forest  
bandon\_oregon  
cape\_blanco\_oregon  
clearwater\_washington  
government\_camp\_multitorpor\_mountain\_oregon  
half\_moon\_bay\_california  
hood\_river\_oregon  
nestucca\_river\_oregon  
north\_bend\_oregon  
placerville\_california  
powers\_coquille\_river\_oregon  
red\_feet\_reservoir\_utah  
republic\_north\_fork\_of\_sanpoil\_river\_washington  
santa\_cruz\_new\_brighton\_state\_beach\_california  
three\_lmn\_clickamas\_river\_oregon  
wolf\_creek\_colorado

homer\_kachemak\_bay  
ketchikan  
talkeetna\_australia\_river  
frederick\_bonanza\_australia  
hobart\_tasmania\_australia  
leka\_cakaudrove\_province\_fiji  
hobart\_tasmania\_australia  
kuningal\_chase\_national\_park\_west\_head\_new\_south\_wales\_australia  
margaret\_creek\_western\_australia  
margaret\_creek\_western\_australia  
mt\_read\_tasmania\_australia  
noah\_creek\_queensland\_australia  
seqapa\_cakaudrove\_province\_fiji  
round\_hill\_nature\_reserve\_mallee\_south\_wales\_australia  
okataina\_new\_zealand  
noah\_creek\_queensland\_australia  
mt\_read\_tasmania\_australia  
margaret\_creek\_western\_australia  
kuningal\_chase\_national\_park\_west\_head\_new\_south\_wales\_australia  
kuningal\_chase\_national\_park\_murra\_track\_new\_south\_wales\_australia  
leka\_cakaudrove\_province\_fiji  
hobart\_tasmania\_australia  
frederick\_bonanza\_australia  
foxton\_estuary\_new\_zealand  
talkeetna\_susitna\_river  
ketchikan  
homer\_kachemak\_bay

Predicted site

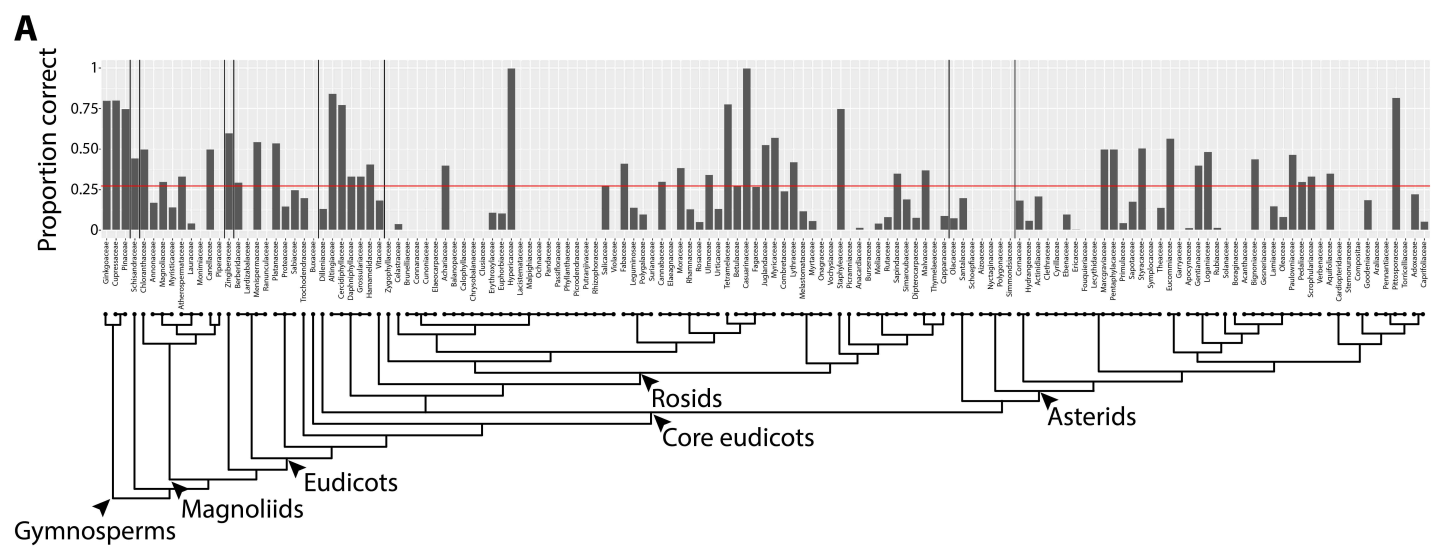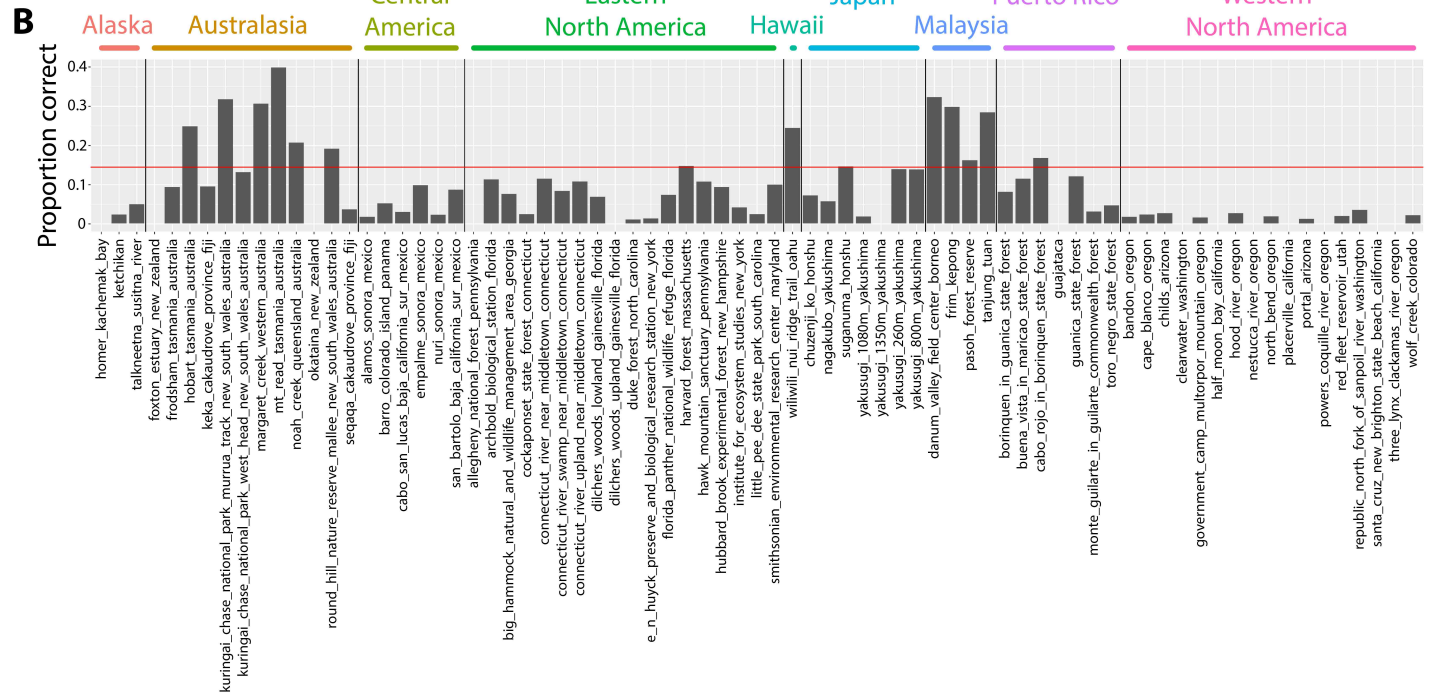

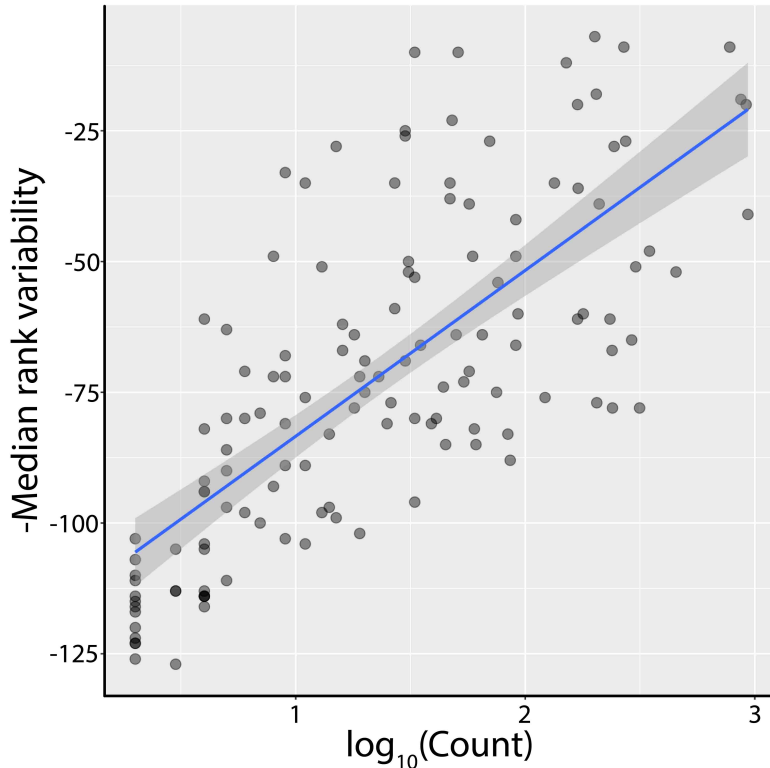

**Supplemental Figure 1: Linear relationship between median ranked variability and count.** Linear regression was used to model  $-\text{median rank variability}$  (higher values indicated more variability within a plant family) as a function of the abundance of each plant family in the dataset, as measured by  $\log_{10}(\text{leaf count})$ . The model (shown in blue) was used to estimate overall leaf shape variance in each plant family, as corrected for sampling depth, by using the residuals from the model as an indication of diversity.
